# Supplementary material for: Opioid Modulation With Buprenorphine/Samidorphan as Adjunctive Treatment for Inadequate Response to Antidepressants: A Randomized Double-Blind Placebo-Controlled Trial
Source: Atypon-hosted journal article supplement (doi:10.1176/appi.ajp.2015.15070921), 2016-02-12
Supplement: appi.ajp.2015.15070921.ds001.pdf [file appi.ajp.2015.15070921.ds001.pdf]

**TABLE S1.** Baseline Antidepressant Use<sup>a</sup>

| ADT                   | Number (%)    |               |               |       |
|-----------------------|---------------|---------------|---------------|-------|
|                       | Placebo       | ALKS 5461 2/2 | ALKS 5461 8/8 | Total |
| <b>Sertraline</b>     | 31<br>(31.31) | 6<br>(25.00)  | 9<br>(45.00)  | 46    |
| <b>Citalopram</b>     | 24<br>(24.24) | 7<br>(29.17)  | 3<br>(15.00)  | 34    |
| <b>Fluoxetine</b>     | 12<br>(12.12) | 5<br>(20.83)  | 4<br>(20.00)  | 21    |
| <b>Duloxetine</b>     | 8<br>(8.08)   | 3<br>(12.50)  | 1<br>(5.00)   | 12    |
| <b>Escitalopram</b>   | 5<br>(5.05)   | 1<br>(4.17)   | 2<br>(10.00)  | 8     |
| <b>Desvenlafaxine</b> | 7<br>(7.07)   | 0<br>(0.00)   | 0<br>(0.00)   | 7     |
| <b>Venlafaxine</b>    | 5<br>(5.05)   | 2<br>(8.33)   | 0<br>(0.00)   | 7     |
| <b>Paroxetine</b>     | 6<br>(6.06)   | 0<br>(0.00)   | 0<br>(0.00)   | 6     |
| <b>Bupropion</b>      | 1<br>(1.01)   | 0<br>(0.00)   | 0<br>(0.00)   | 1     |
| <b>Total</b>          | 99            | 24            | 19            | 142   |

<sup>a</sup> All patients continued on their current antidepressant therapy and on the same dose throughout the course of the study.

**TABLE S2: Sensitivity Analysis Comparing 0.6:0.4 Weights to 0.5:0.5 Weights<sup>a</sup>**

| Assessment     | Stage 1:Stage 2 Weights | Overall Study Placebo-adjusted LS Mean Change from Baseline LS Mean Difference (SE) |                               |
|----------------|-------------------------|-------------------------------------------------------------------------------------|-------------------------------|
|                |                         | ALKS 5461 2/2                                                                       | ALKS 5461 8/8                 |
| <b>HAMD-17</b> | 0.6:0.4                 | -2.8 (1.2)<br><i>p</i> =0.014                                                       | -0.5 (1.2)<br><i>p</i> =0.699 |
|                | 0.5:0.5                 | -3.0 (1.1)<br><i>p</i> =0.008                                                       | -0.7 (1.2)<br><i>p</i> =0.548 |
| <b>MADRS</b>   | 0.6:0.4                 | -4.9 (1.7)<br><i>p</i> =0.004                                                       | -2.1 (1.8)<br><i>p</i> =0.233 |
|                | 0.5:0.5                 | -5.2 (1.7)<br><i>p</i> =0.002                                                       | -2.2 (1.7)<br><i>p</i> =0.199 |

<sup>a</sup> Equal weights results in slightly larger treatment effects but did not affect the interpretation of results.

**TABLE S3. Summary of 100 mm Visual Analogue Scale (VAS) and Addiction Research Center Inventory–Morphine Benzodrine Group (ARCI-MBG) Total Score During Treatment: Stage 1 and Stage 2 Randomized Safety Populations<sup>a</sup>**

|                |                    | VAS Total Score |               |               | ARCI-MBG Total Score |               |               |
|----------------|--------------------|-----------------|---------------|---------------|----------------------|---------------|---------------|
|                |                    | Treatment       |               |               | Treatment            |               |               |
|                | One hour Post-dose | Placebo         | ALKS 5461 2/2 | ALKS 5461 8/8 | Placebo              | ALKS 5461 2/2 | ALKS 5461 8/8 |
| <b>Stage 1</b> | Initial Dose       |                 |               |               |                      |               |               |
|                | n                  | 97              | 22            | 19            | 97                   | 24            | 19            |
|                | Mean (SD)          | 49.4 (23.5)     | 48.6 (26.6)   | 53.0 (32.7)   | 3.3 (3.6)            | 5.9 (5.3)     | 4.8 (4.7)     |
|                | Median             | 50.0            | 50.0          | 50.0          | 2.0                  | 4.5           | 3.0           |
|                |                    |                 |               |               |                      |               |               |
|                | Week 1             |                 |               |               |                      |               |               |
|                | n                  | 94              | 18            | 15            | 94                   | 19            | 15            |
| Mean (SD)      | 48.6 (25.3)        | 61.4 (24.8)     | 52.1 (30.6)   | 3.9 (3.7)     | 6.8 (4.5)            | 4.8 (4.6)     |               |
| <b>Median</b>  | 50.0               | 54.5            | 56.0          | 3.0           | 6.0                  | 4.0           |               |
| <b>Stage 2</b> | Initial Dose       |                 |               |               |                      |               |               |
|                | n                  | 20              | 23            | 21            | 20                   | 23            | 22            |
|                | Mean (SD)          | 54.0 (22.5)     | 45.2 (25.8)   | 45.9 (31.0)   | 5.1 (5.7)            | 5.3 (4.9)     | 3.5 (4.1)     |
|                | Median             | 50.0            | 50.0          | 51.0          | 2.0                  | 3.0           | 3.0           |
|                |                    |                 |               |               |                      |               |               |
|                | Week 1             |                 |               |               |                      |               |               |
|                | n                  | 20              | 18            | 20            | 20                   | 18            | 20            |
| Mean (SD)      | 61.5 (23.0)        | 39.6 (23.7)     | 42.8 (27.0)   | 5.6 (5.8)     | 5.4 (5.1)            | 3.5 (3.7)     |               |
| <b>Median</b>  | 50.5               | 45.0            | 47.0          | 2.5           | 5.0                  | 2.0           |               |

<sup>a</sup> Summary of drug liking (100 mm VAS) and ARCI-MBG Total Score during treatment (Stage 1 and Stage 2 randomized safety populations). Generally neutral scores for Drug Liking were observed for all treatment groups (left). For the ARCI-MBG, inconsistent results were observed in Stages 1 and 2, with higher mean scores for the ALKS 5461 2 mg:2 mg group compared to the other treatment groups in Stage 1 but similar mean scores to placebo in Stage 2 (right).

**FIGURE S1. HAMD-17 and MADRS Treatment Remission Rates<sup>a</sup>**

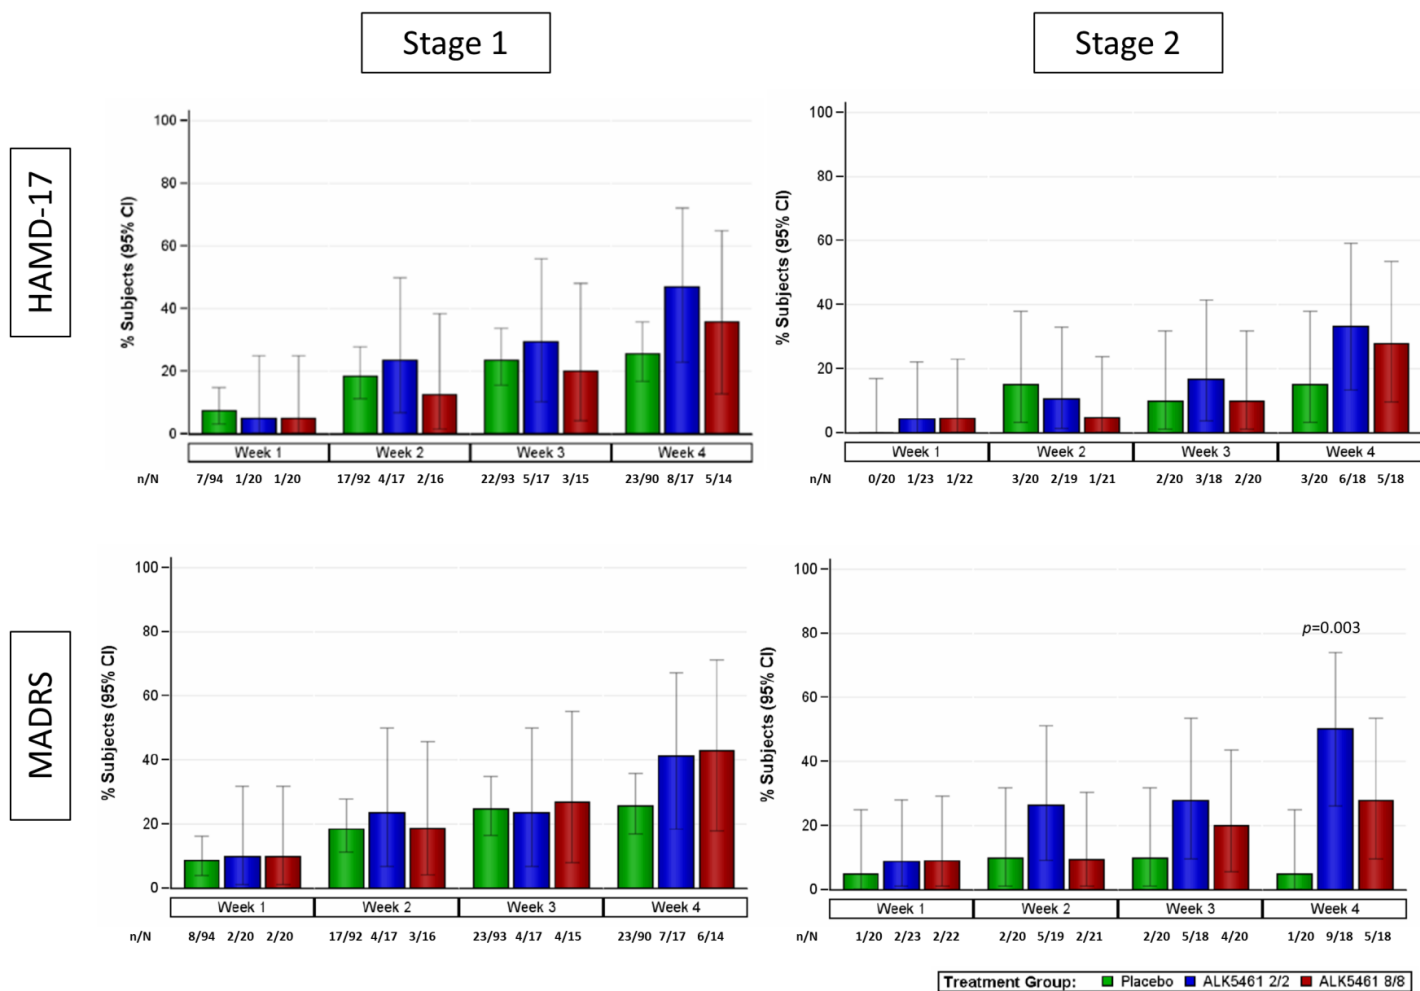

<sup>a</sup> Rates are calculated as the number of patients meeting the criteria for remission ( $\leq 7$  and  $\leq 10$  for HAMD-17 and MADRS, respectively) out of the total number of patients with a HAM-D17 or MADRS assessment at Week 4. Abbreviations: HAMD-17 = 17-item Hamilton Rating Scale for Depression; MADRS = Montgomery-Åsberg Depression Rating Scale.
